# Supplementary material for: Large electric piezoresistance of the flexible molecular semiconductive crystal Q(TCNQ)2 during bending
Source: Royal Society of Chemistry journal article supplement (doi:10.1039/d2ce00571a), 2022-01-01
Supplement: d2ce00571a1.pdf [file d2ce00571a1.pdf]

## Supporting Information

# Large electric piezoresistance of the flexible molecular semiconductive crystal Q(TCNQ)<sub>2</sub> during bending

Norihisa Hoshino<sup>a\*</sup> and Tomoyuki Akutagawa<sup>b</sup>

<sup>a</sup> Department of Materials Science and Technology, Faculty of Engineering, Niigata University, 8050 Ikarashi-2, Niigata 950-2181, Japan.

<sup>b</sup> Institute of Multidisciplinary Research for Advanced Materials (IMRAM), Tohoku University, 2-1-1 Katahira, Aoba-ku, Sendai 980-8577, Japan.

## Contents

**Experimental Methods.**

**Calculation Methods for the stress-strain curves.**

**Figure S1.** Raw data of the bending test for a Q(TCNQ)<sub>2</sub> crystal along *the* c-axis.

**Figure S2.** A stress-strain curve during the electronic resistance measurement.

**Figure S3.** Powder XRD data for Q(TCNQ)<sub>2</sub> crystal.

## Experimental Methods.

Electrical resistivity measurements during the stress-strain test were performed using a homemade apparatus equipped with a micro-load cell (LTS-50GA, Kyowa Dengyo) mounted on a motorized optical stage (TAMM40-10C, Sigma-Koki). One side of the crystal was attached to the glass plate using cyanoacrylate, while the other side was pressed by an indenter (silicon AFM tip, NSC35/AIBS, MikroMasch) attached to the load cell. The motorized stage was stepped 10  $\mu\text{m}$  at 5-second intervals (0.12 mm/min). An AC voltage (2.0  $V_{p-p}$ , 10 Hz) was applied to the input terminals of the load cell, and the output voltage was acquired using a lock-in amplifier (LI5640, NF Corporation). The electrical resistance of the bent crystal was measured using a four-probe method with a voltmeter (34401, Hewlett-Packard) and current source (3245A, Hewlett-Packard). Electric connections were made using gold wires (10  $\mu\text{m}$   $\phi$ ) and gold paste (No. 8560, Tokuriki). During the stress-strain test, a DC current of 1 mA was applied to the crystal, and the generated voltage was recorded. Electronic instruments were controlled using the software Igor Pro 7.0 (Wavemetrics).

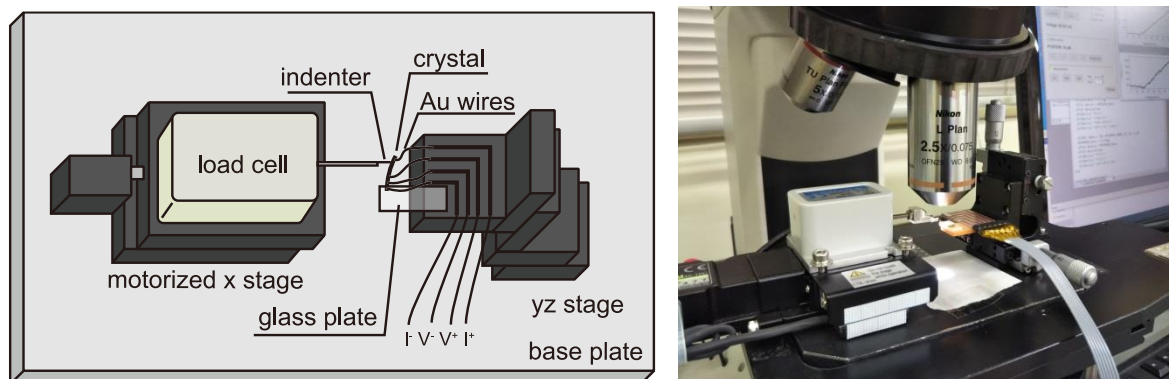

Schematic and photograph of the measurement apparatus.

### Calculation Methods for the stress-strain curves.

The configurations for the three-point loading and cantilever tests are shown below. In the three-point test using the standard method (ISO 178:2019 and ASTM D0790-10), the flexural stress  $\sigma_f$  and flexural strain  $\varepsilon_f$  were calculated using the following equations:

$$\sigma_f = \frac{3FL}{2bh^2} \quad , \quad \varepsilon_f = \frac{6sh}{L^2}$$

where  $F$ ,  $b$ , and  $s$  denote the applied force, width of the test piece, and deflection, respectively.

As shown in the diagram, the cantilever test had a configuration of half that of the three-point loading test. By substituting  $L$  into the above equations with  $L = 2L'$ , the following equations are obtained:

$$\sigma_f = \frac{6FL'}{2bh^2} \quad , \quad \varepsilon_f = \frac{3sh}{2L'^2}$$

In this study, the stress-strain curve was calculated using the above equations.

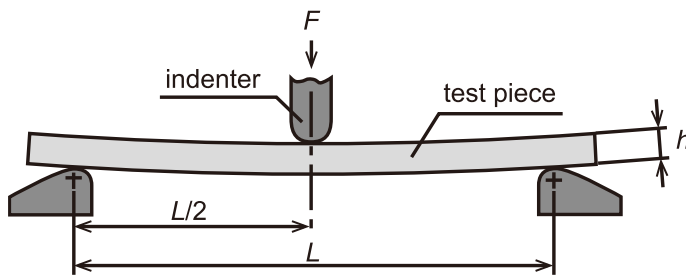

Three-point loading test

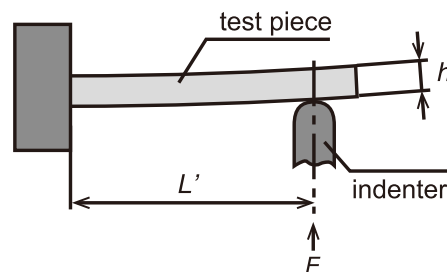

Cantilever test

Configurations for the three-point loading and cantilever tests.

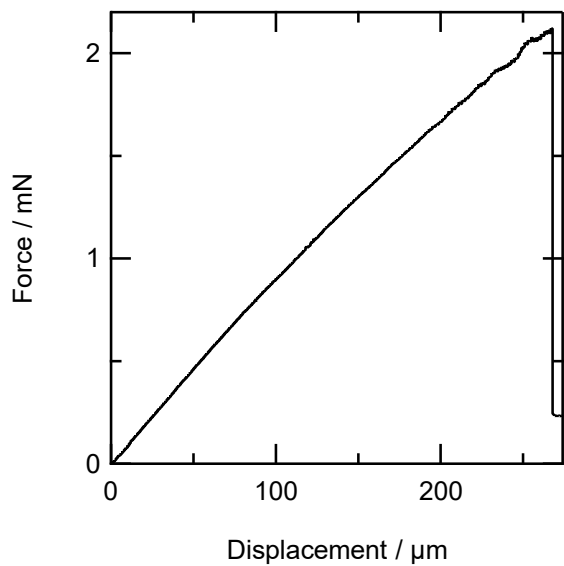

**Figure S1.** Raw data for the bending test of a  $\text{Q}(\text{TCNQ})_2$  crystal along  $c$  axis.

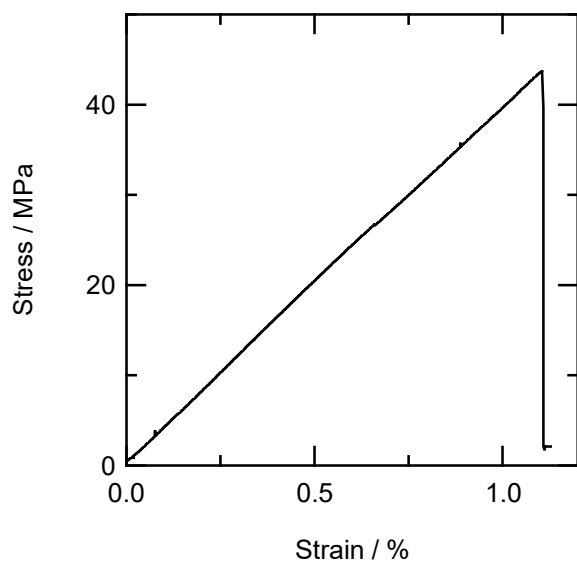

**Figure S2.** A stress-strain curve during the electronic resistance measurement.

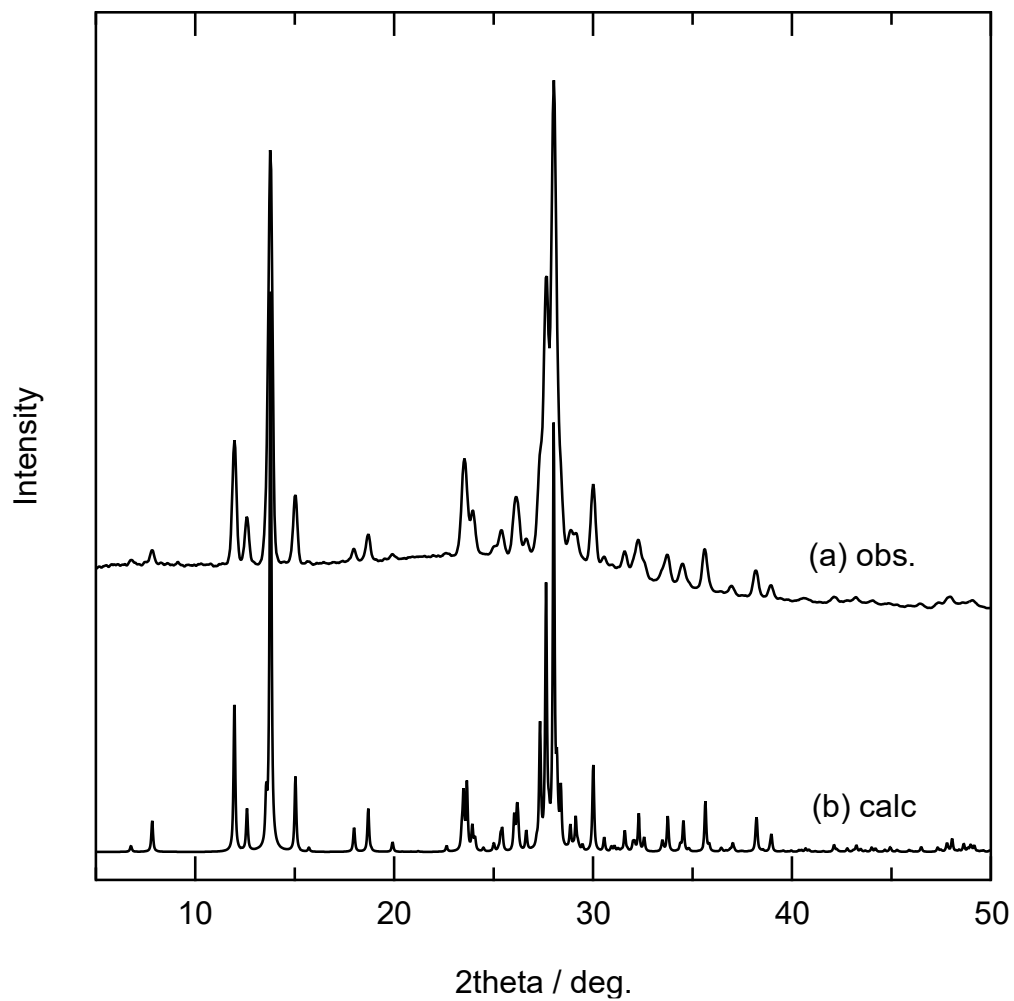

**Figure S3.** Powder XRD data for  $Q(TCNQ)_2$ . (a) Observed for the granulated crystals at 300 K. (b) Calculated for the literature data in ref. 12.
